# Supplementary material for: Bromide-based nonflammable electrolyte for safe and long-life sodium metal batteries
Source: Royal Society of Chemistry journal article supplement (doi:10.1039/d3ee03332e), 2023-12-07
Supplement: d3ee03332e1.pdf [file d3ee03332e1.pdf]

## Bromide-based nonflammable electrolyte for safe and long-life sodium metal batteries

Changjian Zuo, Dejian Dong, Huawei Wang, Yue Sun, and Yi-Chun Lu\*

Electrochemical Energy and Interfaces Laboratory, Department of Mechanical and Automation Engineering, The Chinese University of Hong Kong, Shatin, N.T., 999077 Hong Kong, SAR, China.

\*Corresponding Author: Yi-Chun Lu. E-mail: [yichunlu@mae.cuhk.edu.hk](mailto:yichunlu@mae.cuhk.edu.hk)

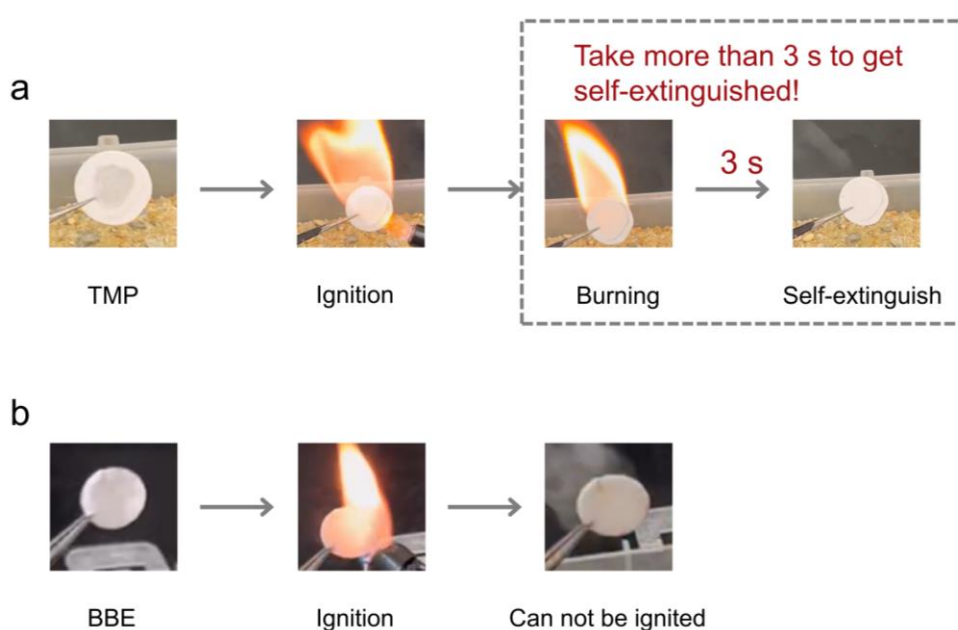

**Figure S1.** The digital photos of ignition experiments for TMP (a) and BBE (b) solvents.

| Scavenger bonds | Bonding energy |
|-----------------|----------------|
| C-Br            | 276 kJ/mol     |
| C-Cl            | 341kJ/mol      |
| C-F             | 445 kJ/mol     |
| P-O             | 410 kJ/mol     |
| P=O             | 544 kJ/mol     |

**Table S1.** Typical bonding energy of scavengers for the P-based, Cl-based, F-based and Br-based flame-retardants, which indicates the ability to dissociate from the retardants.

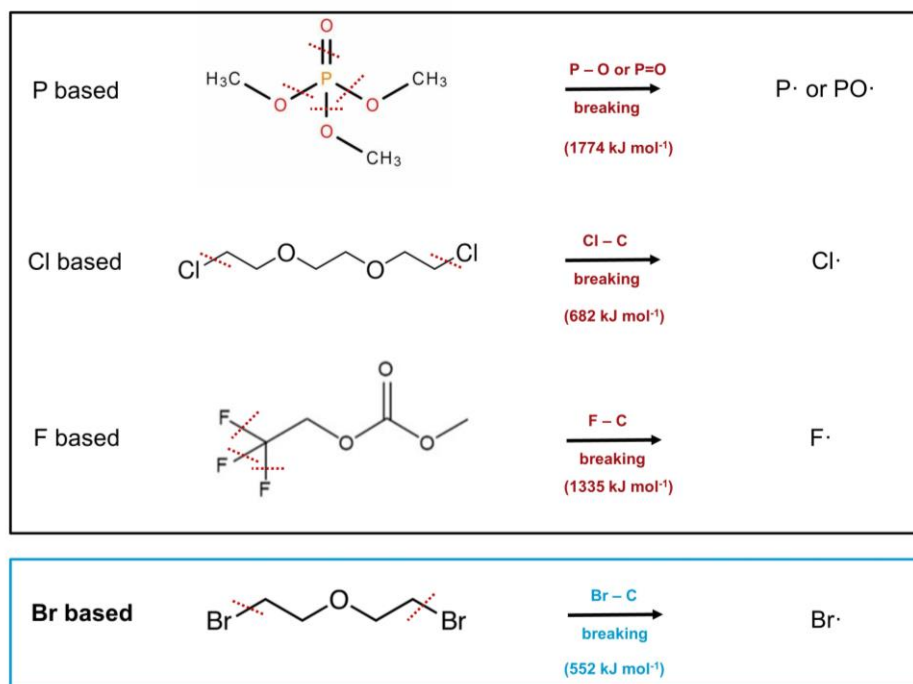

**Figure S2.** Dissociation processes of typical retardants when heated: the hard dissociation processes for typical P-based, Cl-based and F-based retardants in the black rectangle; the easier dissociation processes for Br-based retardant in the blue rectangle.

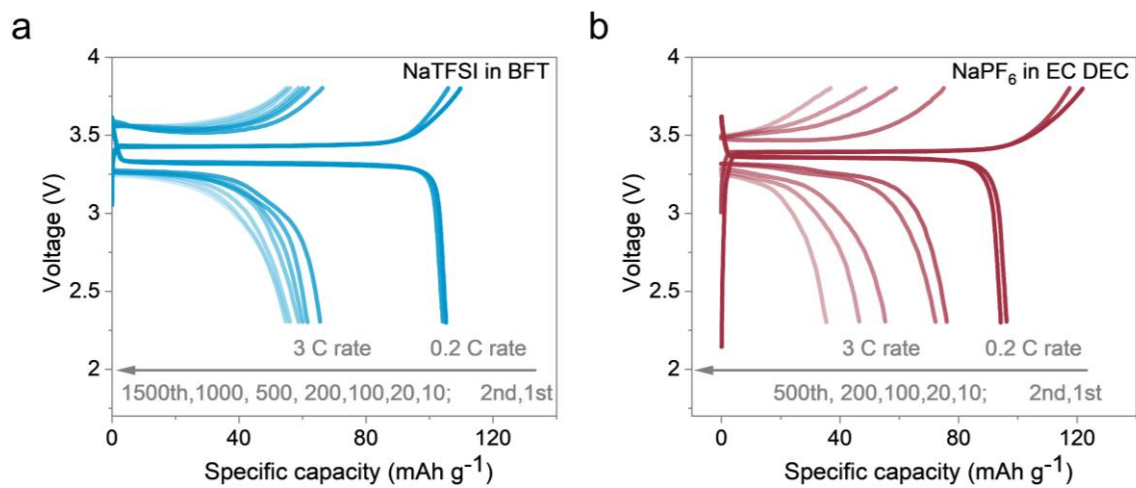

**Figure S3.** The cycling profiles for the  $\text{Na}_3\text{V}_2(\text{PO}_4)_3//\text{Na}$  cells in NaTFSI in BFT electrolyte (a) and NaPF<sub>6</sub> in EC DEC electrolyte (b).

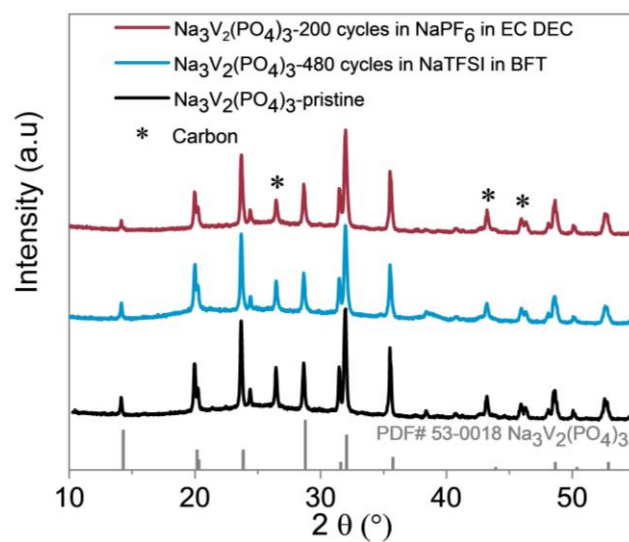

**Figure S4.** The XRD patterns for pristine and cycled  $\text{Na}_3\text{V}_2(\text{PO}_4)_3$  cathodes in  $\text{NaPF}_6$  in EC DEC electrolyte (after 200 cycles) and NaTFSI in BFT electrolyte (after 480 cycles).

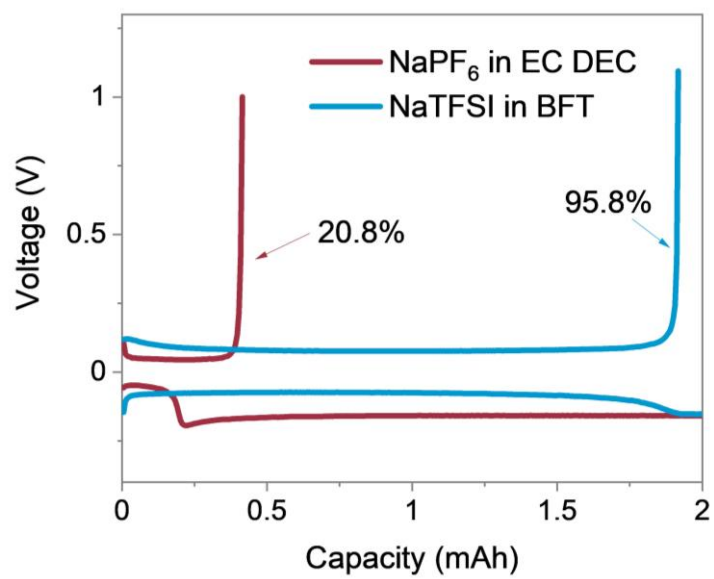

**Figure S5.** The coulombic efficiency plots in Na//Cu cells in NaPF<sub>6</sub> in EC DEC and NaTFSI in BFT electrolytes.

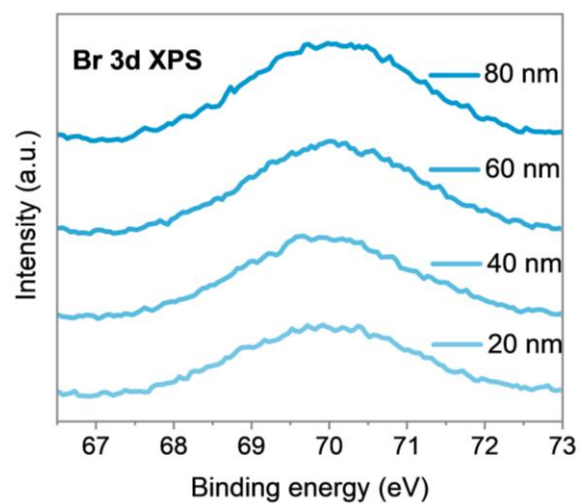

**Figure S6.** The Br 3d orbitals XPS spectrums at different depths sputtered by Ar<sup>+</sup> of sodium anodes after cycling for 3 cycles at 0.5 mAh cm<sup>-2</sup> @ 0.5 mA cm<sup>-2</sup> in NaTFSI in BFT electrolyte.

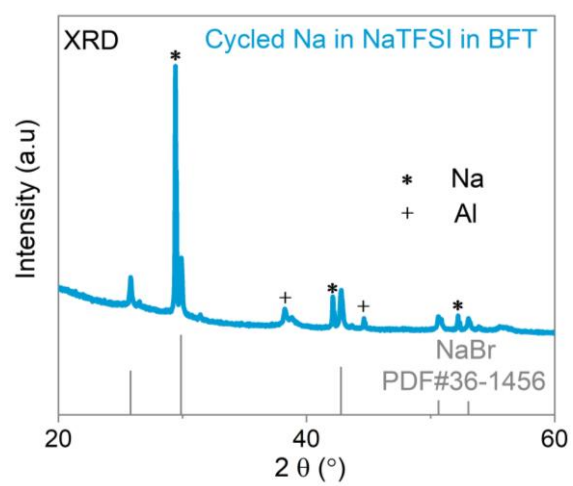

**Figure S7.** X-ray diffraction patterns of the cycled sodium metal anode in NaTFSI in BFT electrolyte after 3 cycles at  $0.5 \text{ mAh cm}^{-2}$  @  $0.5 \text{ mA cm}^{-2}$ .



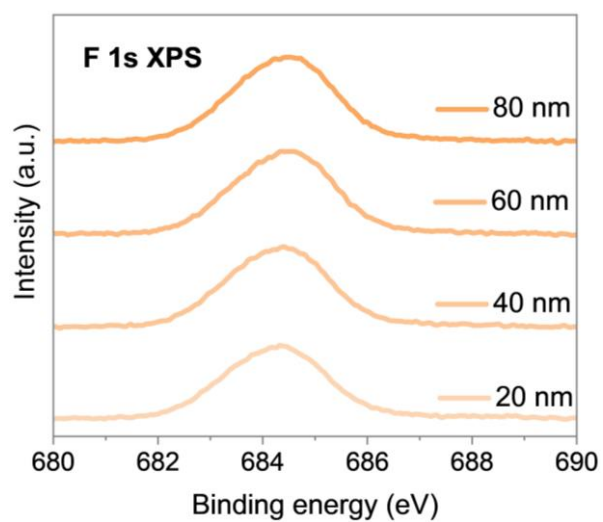

**Figure S8.** The F 1s orbitals XPS at different depths sputtered by  $\text{Ar}^+$  of sodium anodes after cycling for 3 cycles at  $0.5 \text{ mAh cm}^{-2}$  @  $0.5 \text{ mA cm}^{-2}$  in NaTFSI in BFT electrolyte.

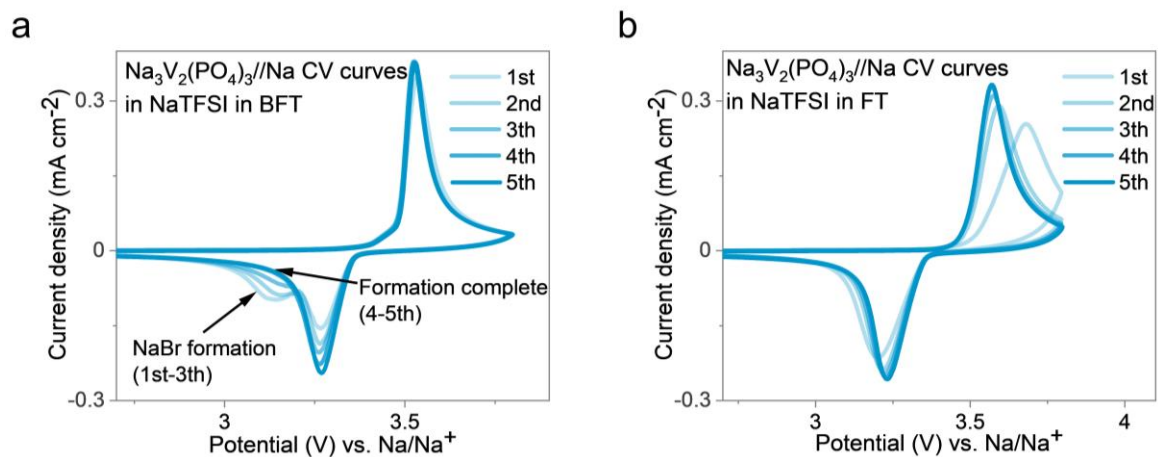

**Figure S9.** The CV curves from 1<sup>st</sup>-5<sup>th</sup> cycles of  $\text{Na}_3\text{V}_2(\text{PO}_4)_3//\text{Na}$  cells at scan rate of  $0.2 \text{ mV s}^{-1}$  between 2-3.8 V in NaTFSI in BFT electrolyte (a) and NaTFSI in FT electrolyte (b).

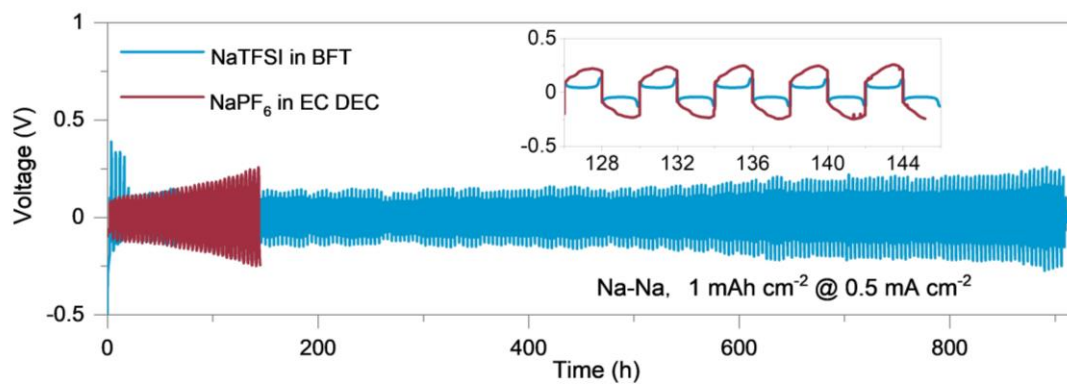

**Figure S10.** The Na//Na symmetric cells in NaTFSI in BFT and NaPF<sub>6</sub> in EC DEC electrolytes at 1 mAh cm<sup>-2</sup> @ 0.5 mA cm<sup>-2</sup>.

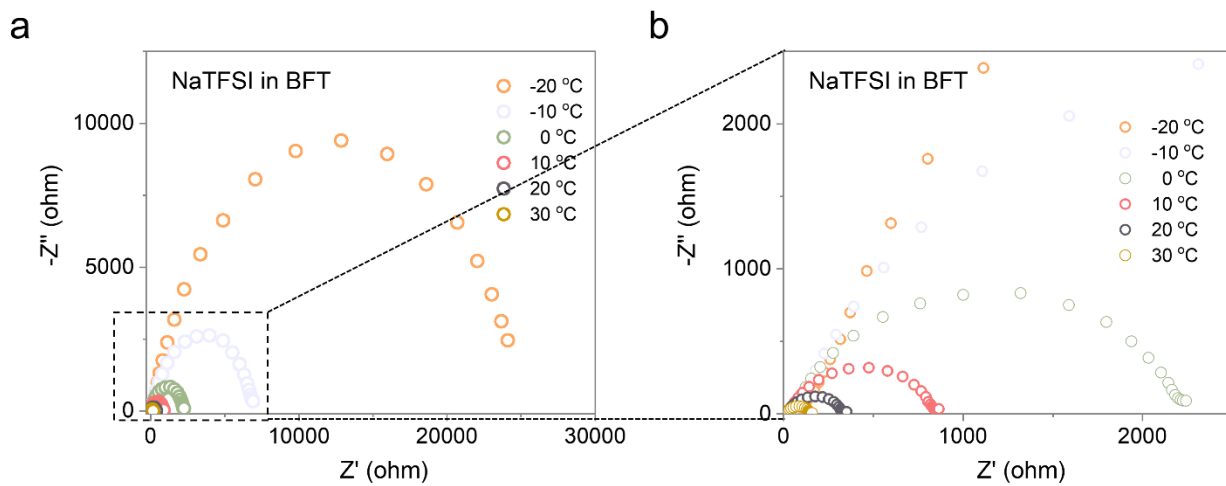

**Figure S11.** The EIS curves for the Na//Na symmetric cells after 3 formation cycles at 0.5 mA cm<sup>-2</sup> @ 0.5 mA cm<sup>-2</sup> in NaTFSI in BFT at different temperatures (a) and the enlarged patterns (b).

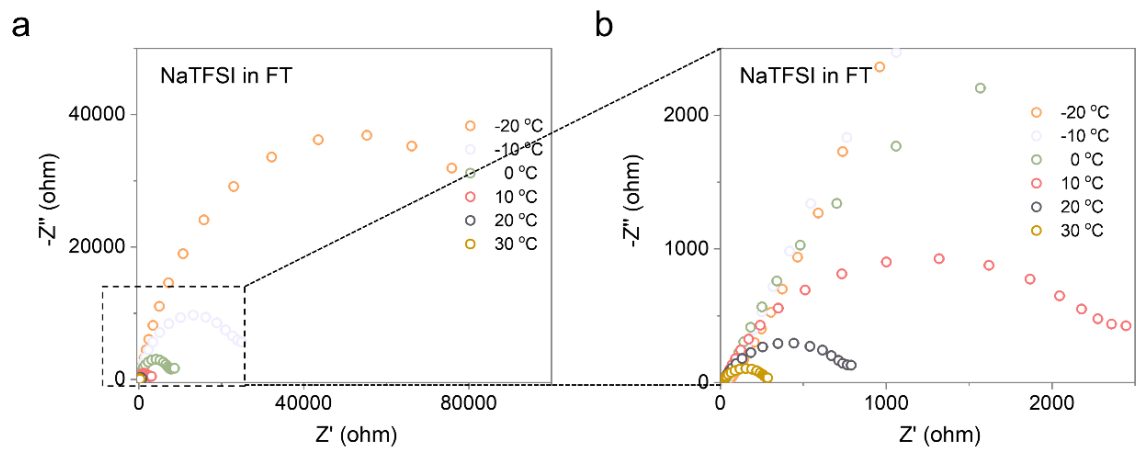

**Figure S12.** The EIS curves for the Na//Na symmetric cells after 3 formation cycles at  $0.5 \text{ mAh cm}^{-2}$  @  $0.5 \text{ mA cm}^{-2}$  in NaTFSI in FT at different temperatures (a) and the enlarged patterns (b).

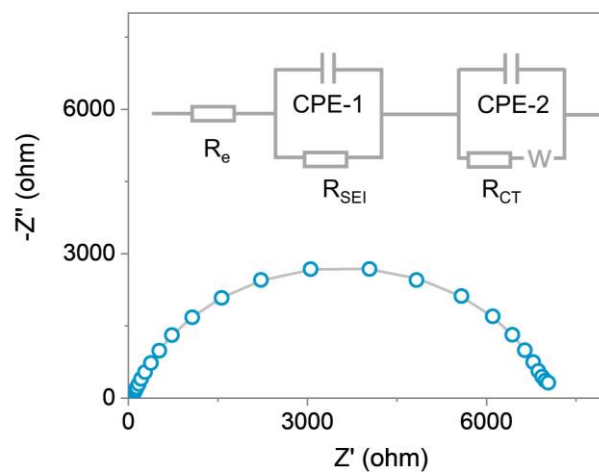

**Figure S13.** The circuit model used to fit the EIS curves of the symmetric cell at different temperatures. And the  $R_e$ ,  $R_{SEI}$  and  $R_{CT}$  represent for the resistance of bulk electrolyte, resistance of SEI and resistance of de-solvation respectively.

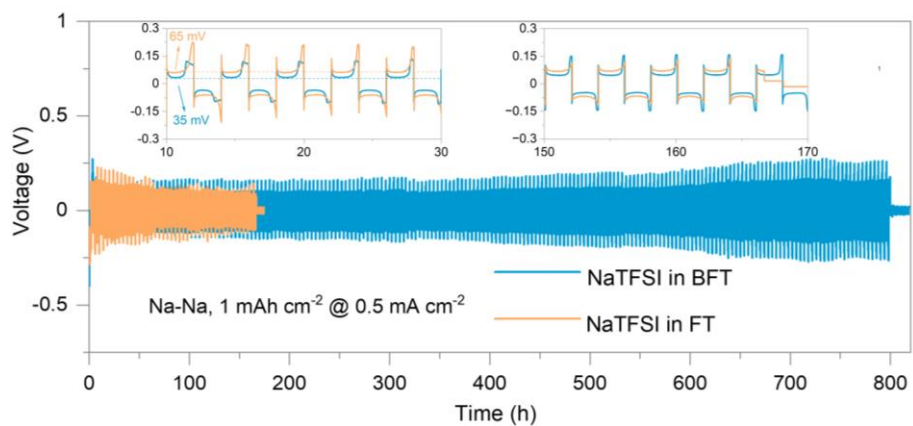

**Figure S14.** The Na//Na symmetric cells in NaTFSI in BFT and NaTFSI in FT electrolytes at  $1 \text{ mAh cm}^{-2}$  @  $0.5 \text{ mA cm}^{-2}$ .

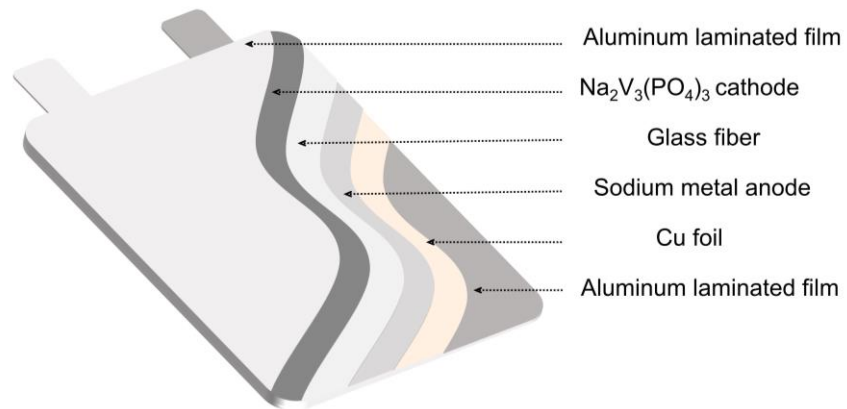

**Figure S15.** Structure of sodium metal pouch cells.



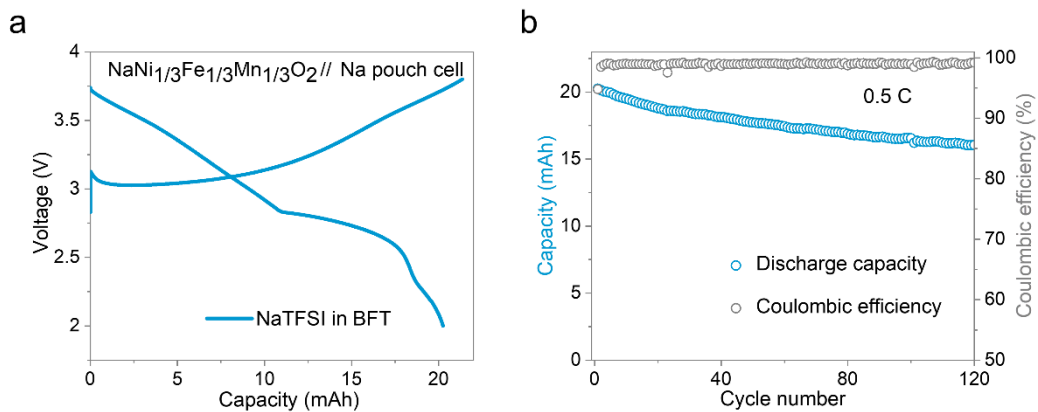

**Figure S16.** The electrochemical performance of NaNi<sub>1/3</sub>Fe<sub>1/3</sub>Mn<sub>1/3</sub>O<sub>2</sub>//Na pouch cells in NaTFSI in BFT electrolyte. (a) The first charge and discharge curves of NaNi<sub>1/3</sub>Fe<sub>1/3</sub>Mn<sub>1/3</sub>O<sub>2</sub>//Na pouch cell at 0.5 C between 2.0-3.8 V; (b) The cycling performance and coulombic efficiency for the NaNi<sub>1/3</sub>Fe<sub>1/3</sub>Mn<sub>1/3</sub>O<sub>2</sub>//Na pouch cell at 0.5 C between 2.0-3.8 V.

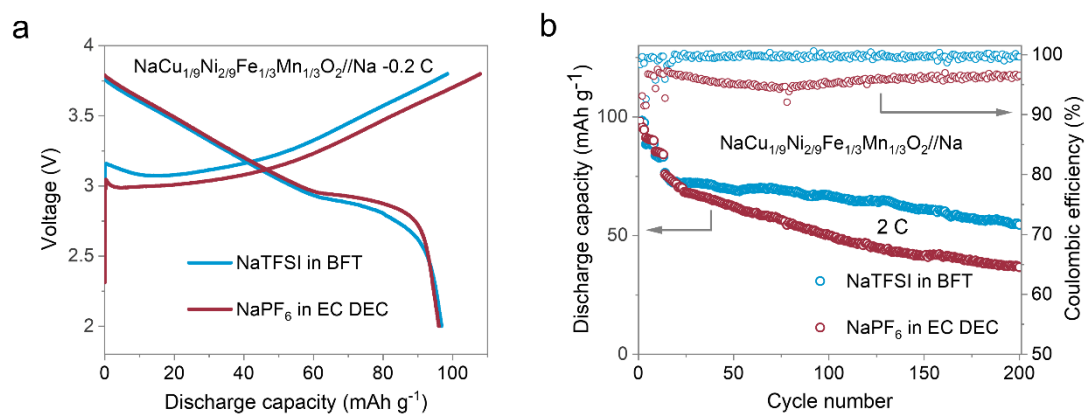

**Figure S17.** The electrochemical performance of  $\text{NaCu}_{1/9}\text{Ni}_{2/9}\text{Fe}_{1/3}\text{Mn}_{1/3}\text{O}_2//\text{Na}$  cells in NaTFSI in BFT and  $\text{NaPF}_6$  in EC DEC electrolytes. (a) The first charge and discharge curves of  $\text{NaCu}_{1/9}\text{Ni}_{2/9}\text{Fe}_{1/3}\text{Mn}_{1/3}\text{O}_2//\text{Na}$  in NaTFSI in BFT and  $\text{NaPF}_6$  in EC DEC electrolytes at 0.2 C between 2.0-3.8 V; (b) The cycling performance and coulombic efficiency of  $\text{NaCu}_{1/9}\text{Ni}_{2/9}\text{Fe}_{1/3}\text{Mn}_{1/3}\text{O}_2//\text{Na}$  in NaTFSI in BFT and  $\text{NaPF}_6$  in EC DEC electrolytes between 2.0-3.8 V (3 cycles at 0.2 C, 5 cycles at 0.5 C, 5 cycles at 1 C and then keep cycling at 2 C).
